# Supplementary material
Source: Springer Nature journal article supplement (https://www.springermedizin.de/resource/supplementary/12961_2008_74_MOESM6_ESM.pdf/9571378)
Supplement: MOESM6 [file 9571378]

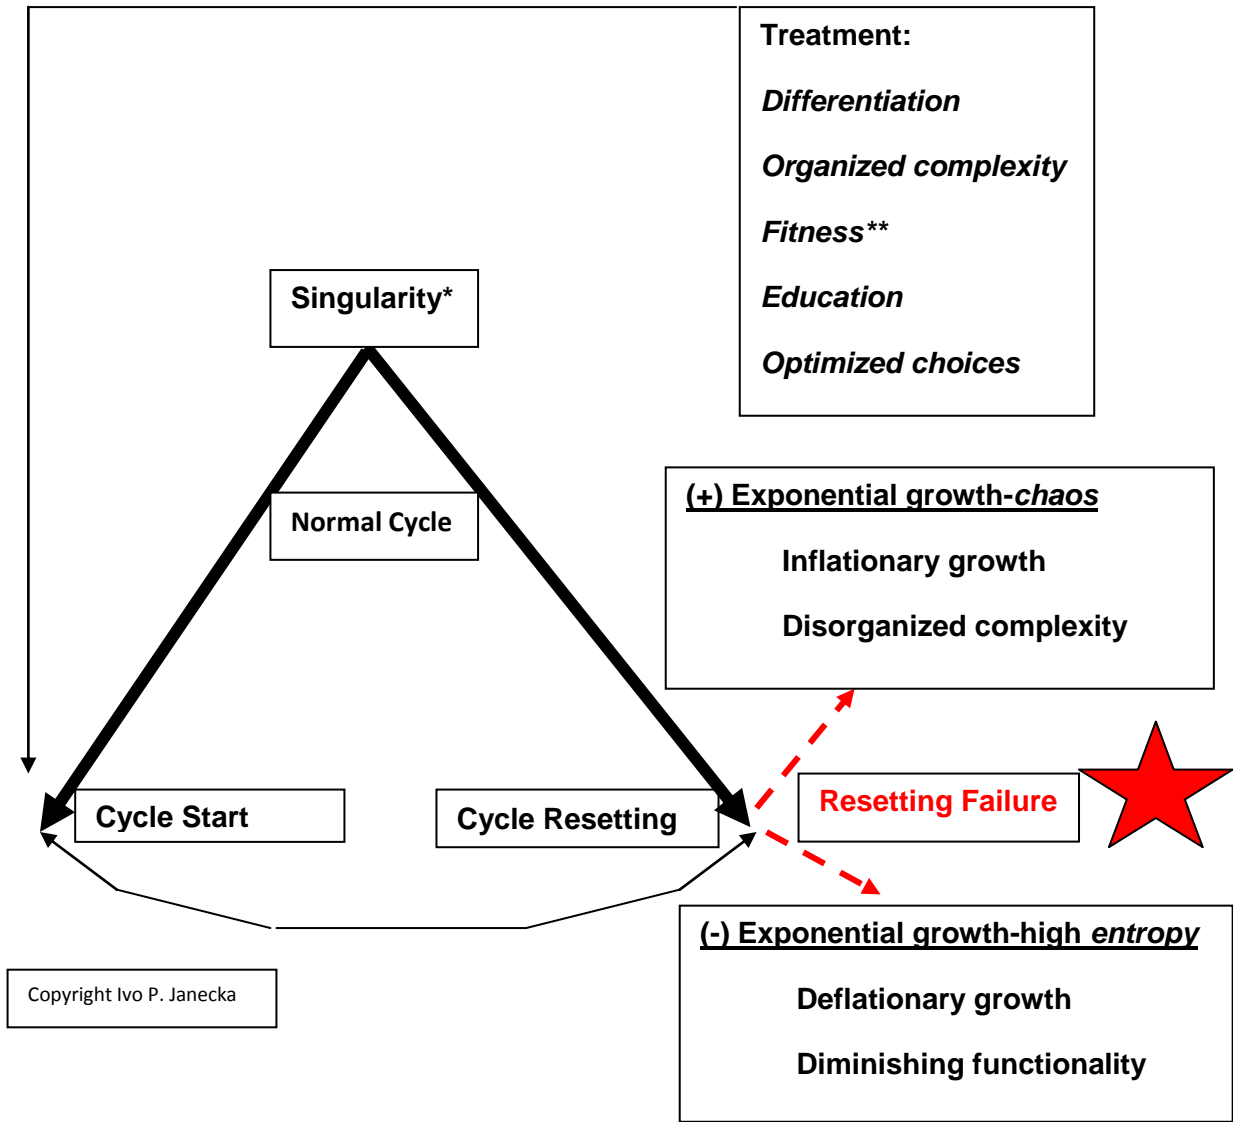

Figure 5: Consequences of cycle resetting failure in chaos or entropy;

corrective treatment options (Treatment)

\* a point where no pendulum/system oscillation exists

\*\*endurance, speed, strength and flexibility
